# Supplementary material for: The matrix domain contributes to the nucleic acid chaperone activity of HIV-2 Gag
Source: PubMed Central journal article supplement (PMC4794849; doi:10.1186/s12977-016-0245-1), 2016-03-17
Supplement: 12977_2016_245_MOESM1_ESM.pdf [file 12977_2016_245_MOESM1_ESM.pdf]

## Additional file 1

### The matrix domain contributes to the nucleic acid chaperone activity of HIV-2 Gag

Katarzyna Pachulska-Wieczorek, Leszek Błaszczyk, Marcin Biesiada, Ryszard W. Adamiak and

Katarzyna J. Purzycka

**Analysis of the nucleotides identity at the HIV-2 Gag $\Delta$ p6, NC and MA binding sites within HIV-2 5'UTR RNA.** Nucleotides displaying strongest decrease of hydroxyl radical cleavage in the presence of each protein and occurring within the site where at least two consecutive residues showed decrease were counted.

| Protein\residue | A  | C  | G  | U  |
|-----------------|----|----|----|----|
| Gag $\Delta$ p6 | 41 | 16 | 46 | 15 |
| NC              | 33 | 16 | 28 | 13 |
| MA              | 16 | 17 | 27 | 8  |
