# Supplementary material for: The matrix domain contributes to the nucleic acid chaperone activity of HIV-2 Gag
Source: PubMed Central journal article supplement (PMC4794849; doi:10.1186/s12977-016-0245-1), 2016-03-17

## Additional file 2

### The matrix domain contributes to the nucleic acid chaperone activity of HIV-2 Gag

Katarzyna Pachulska-Wieczorek, Leszek Błaszczyk, Marcin Biesiada, Ryszard W. Adamiak and Katarzyna J. Purzycka

The representative electrophoretic analysis of the concentration course TAR RNA / TAR (-)DNA annealing assays. Lanes 0 contain a control sample lacking protein. The protein concentrations are indicated above each lane.

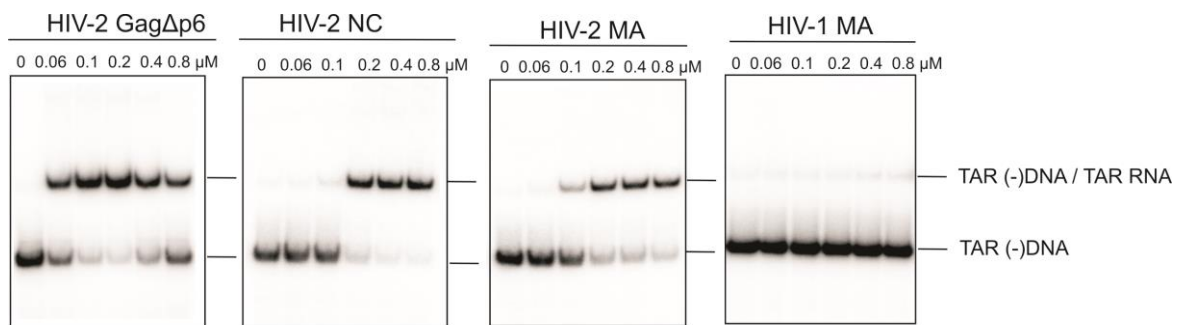

The representative electrophoretic analysis of the time course TAR RNA / TAR (-)DNA annealing assays. Reaction times are indicated above each lane.

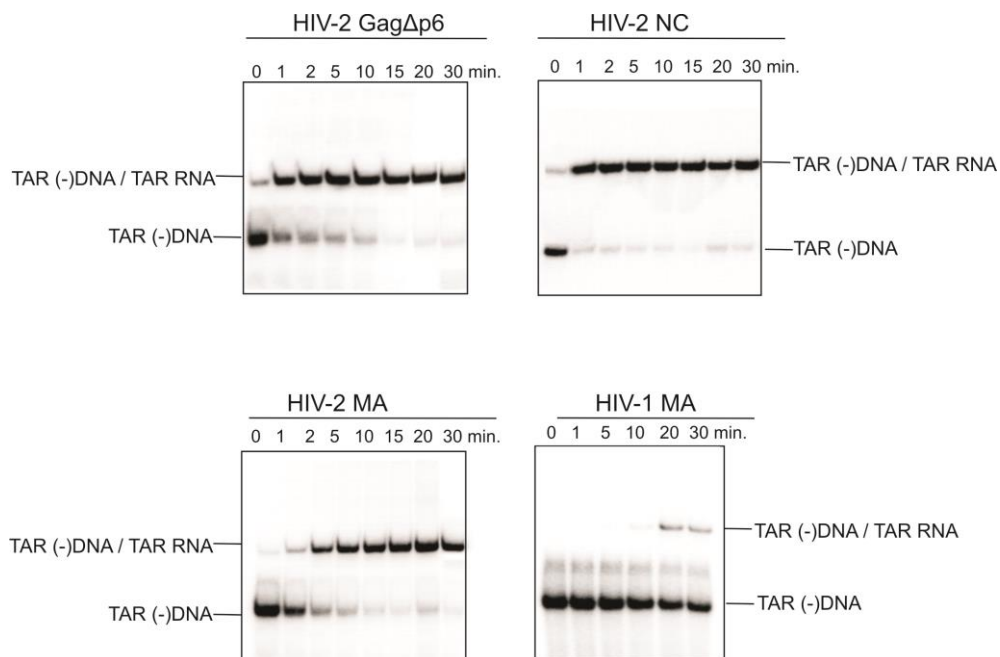

The representative electrophoretic analysis of the concentration course tRNA<sup>Lys3</sup> annealing assays. Lanes 0 contain a control sample lacking protein. The protein concentrations are indicated above each lane.

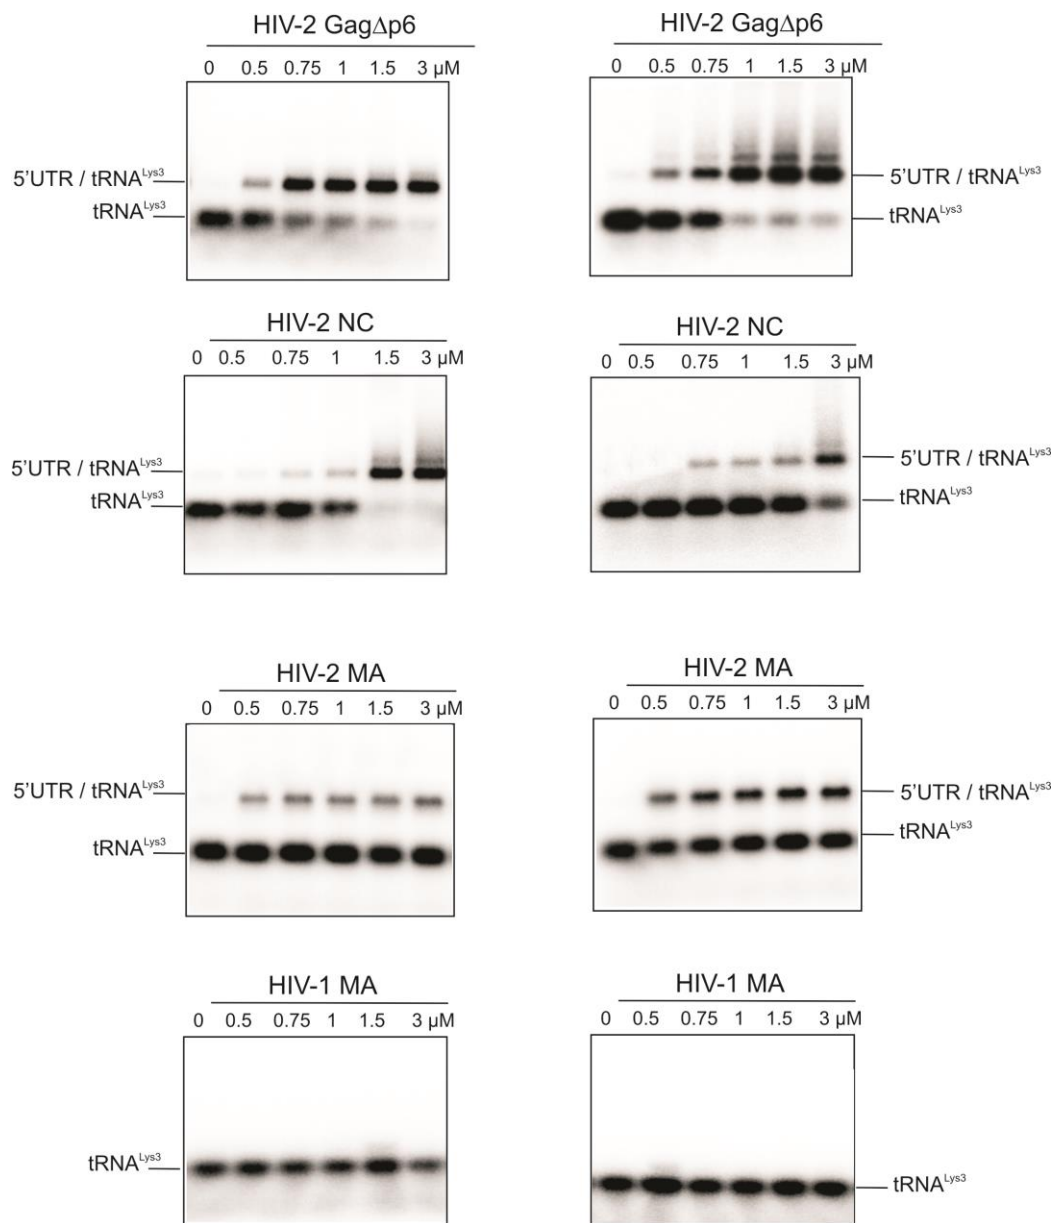

The representative electrophoretic analysis of the time course tRNA<sup>Lys3</sup> annealing assays. Reaction times are indicated above each lane.

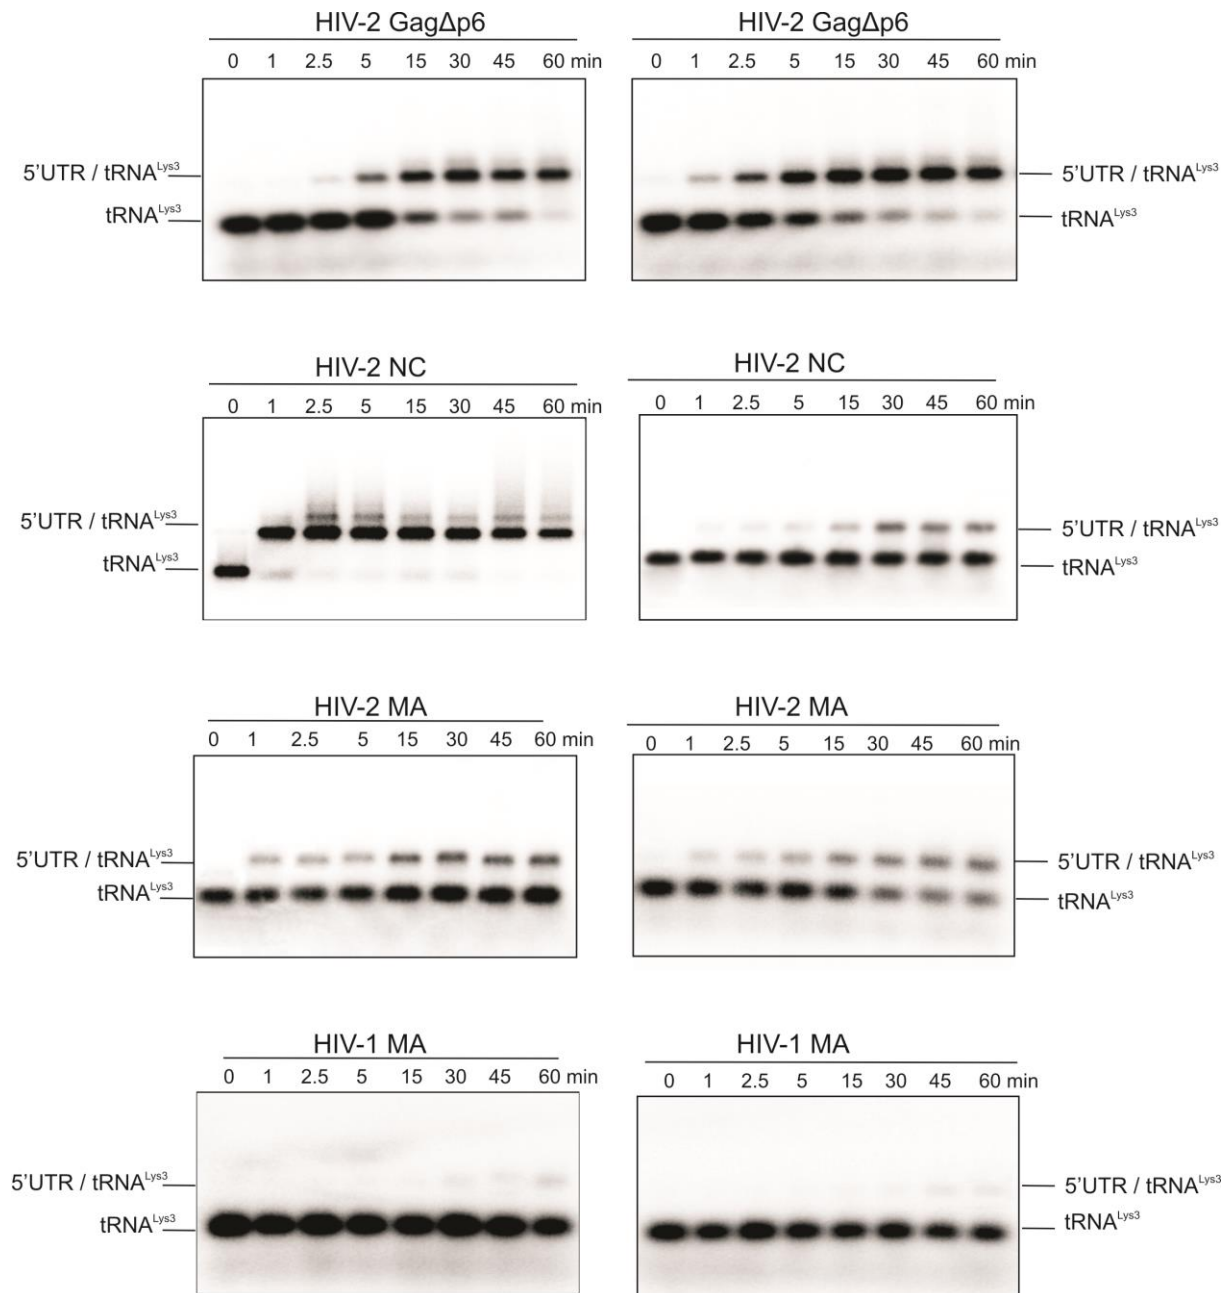

The representative electrophoretic analysis of the concentration course HIV-2 RNA dimerization assays. Lanes 0 contain a control sample lacking protein. The protein concentrations are indicated above each lane. The monomer (M) and dimer (D) bands of HIV-2 +1 – 444 RNA are indicated.

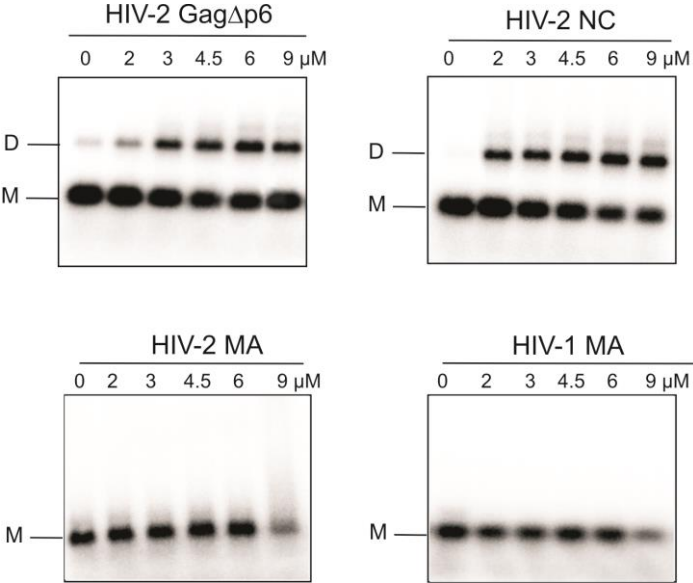

The representative electrophoretic analysis of the time course HIV-2 RNA dimerization assays. Reaction times are indicated above each lane. The monomer (M) and dimer (D) bands of HIV-2 +1 – 444 RNA are indicated.

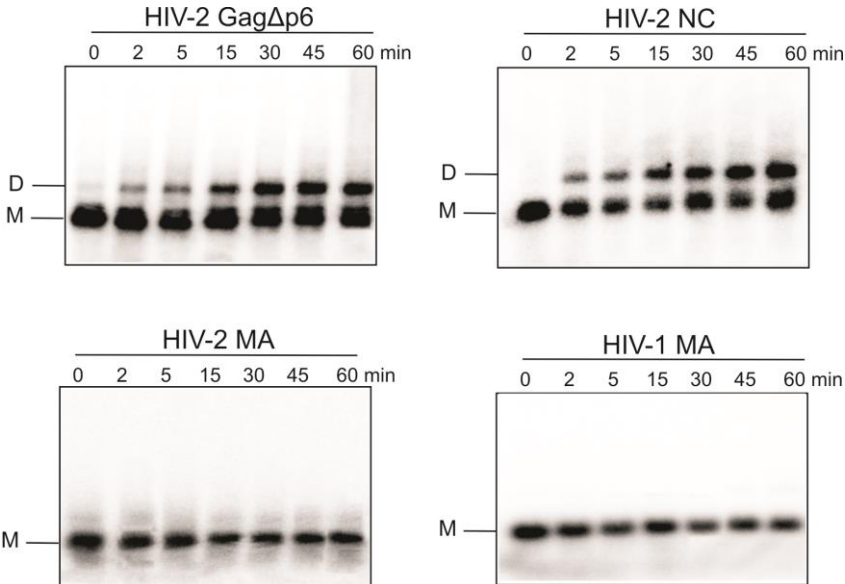

Supplement: 12977_2016_245_MOESM2_ESM.pdf [file 12977_2016_245_MOESM2_ESM.pdf]
