# Supplementary material for: The matrix domain contributes to the nucleic acid chaperone activity of HIV-2 Gag
Source: PubMed Central journal article supplement (PMC4794849; doi:10.1186/s12977-016-0245-1), 2016-03-17
Supplement: 12977_2016_245_MOESM6_ESM.pdf [file 12977_2016_245_MOESM6_ESM.pdf]

## Additional file 6

### The matrix domain contributes to the nucleic acid chaperone activity of HIV-2 Gag

Katarzyna Pachulska-Wieczorek, Leszek Błaszczyk, Marcin Biesiada, Ryszard W. Adamiak and

Katarzyna J. Purzycka

#### Primers used in this study.

| Molecule                                                  | Sequence                                                                                                                                 |
|-----------------------------------------------------------|------------------------------------------------------------------------------------------------------------------------------------------|
| Generation of templates for <i>in vitro</i> transcription |                                                                                                                                          |
| HIV-1 TAR                                                 | 5'- <i>TAATACGACTCACTATAGGTCTCTCTTGTAGACCAGG</i> -3'<br>5'-GGGTTCTTGCTAGCCAGAGAGCTCCCGGGCTCGACCTGGTCTAACAA<br>GAGAGACC-3'                |
| tRNA <sup>Lys3</sup>                                      | 5'- <i>TAATACGACTCACTATAGCCCGGATAGCTCAGTCGGTAGAGCATCAGAC</i><br>TTTAAATCTGAGGGTCCAG-3'<br>5'-TGGCGCCCGAACAGGGACTTGAACCCTGGACCCTCAGATT-3' |
| HIV-2 TARpA                                               | 5'- <i>GAATTCTAATACGACTCACTATAGGGTCGCTCTGCGGAGAG</i> -3'<br>5'-CACACACTTAACTTGCTTCT-3'                                                   |
| HIV-2 PBS                                                 | 5'- <i>GAATTCTAATACGACTCACTATAGTCCTAGTCGCCGCCT</i> -3'<br>5'-TCCTGCCGCCCTTACTGCCT-3'                                                     |
| HIV-2 Ψ                                                   | 5'- <i>GAATTCTAATACGACTCACTATAGACAAACCACGACGGAGTGCT</i> -3'<br>5'-GTTTCTCGCGCCCATCTCCCACAATCTTCTACCTG-3'                                 |
| +1 – 444 HIV-2 RNA                                        | 5'- <i>GAATTCTAATACGACTCACTATAGGGTCGCTCTGCGGAGAG</i> -3'<br>5'-CGCTCCACACGCTGCCTTTG-3'                                                   |
| +1 – 560 HIV-2 RNA                                        | 5'- <i>GAATTCTAATACGACTCACTATAGGGTCGCTCTGCGGAGAG</i> -3'<br>5'-GTTTCTCGCGCCCATCTCCCACAATCTTCTACCTG-3'                                    |
| +1 – 891 HIV-2 RNA                                        | 5'- <i>GAATTCTAATACGACTCACTATAGGGTCGCTCTGCGGAGAG</i> -3'<br>5'-CTGCAGTTCCTGTTTCTGCCACTA-3'                                               |
| Reverse transcription                                     |                                                                                                                                          |
| 186                                                       | 5'-CGACTAGGAGAGATGGGAGC-3'                                                                                                               |
| 540                                                       | 5'-GTTTCTCGCGCCCATCTCCCA-3'                                                                                                              |
| 787                                                       | 5'-GCACCAAATGACGCAGACAG-3'                                                                                                               |

<sup>a</sup>Promotor of T7 polymerase is annotated in italic.
